# Supplementary material for: Multi-omics reveals crosstalk between lactylation and m6A methylation promotes angiogenesis in lung adenocarcinoma
Source: Research Square preprint supplement (doi:10.21203/rs.3.rs-7466899/v1), 2025-09-09
Supplement: Supplementary file 1 [file 9303d0142c71bf93f3c3282a.xlsx]

## Sheet: Sheet1
Information about the primers used for RT-qPCR; antibodies used for WB and RIP
Information of the primer.
RT-qPCR primer name	primer sequence (5’-3’)
FTO(Forward)	TTCTGTCTGCCGTCCTGATCCC
FTO(Reverse)	GTCTGGTTTCTGCTGTGCTGGTAG
GAPDH(Forward)	CAGGAGGCATTGCTGATGAT
GAPDH(Reverse)	GAAGGCTGGGGCTCATTT
YTHDF2(Forward)	TAGCCAGCTACAAGCACACC
YTHDF2(Reverse)	TTTCCCACGACCTTGACGTT
interfering RNA name	sequence (5’-3’)
shEZH2-1(Forward)	GAUAGAGAAUGUGGGUUUAdTdT
shEZH2-1(Reverse)	UAAACCCACAUUCUCUAUCdTdT
shEZH2-2(Forward)	GGAUGGUACUUUCAUUGAAdTdT
shEZH2-2(Reverse)	UUCAAUGAAAGUACCAUCCdTdT
shFTO-1(Forward)	CUACAACGGACAAGAUGAATT
shFTO-1(Reverse)	UUCAUCUUGUCCGUUGUAGTT
shFTO-2(Forward)	GGAAGAAGAUGGAGGGUGUTT
shFTO-2(Reverse)	ACACCCUCCAUCUUCUUCCTT
siTIMP2(Forward)	GGACCUGA-CAAGGACAUCGAAUUUA
siTIMP2(Reverse)	UAAAUUC-GAUGUCCUUGUCAGGUCC
siYTHDF2-1(Forward)	GCACAGAAGUUGCAAGCAAUGTT
siYTHDF2-1(Reverse)	CAUUGCUUGCAACUUCUGUGCTT
siYTHDF2-2(Forward)	GAGGAAGAAGAAAGUGUUAAATT
siYTHDF2-2(Reverse)	UUUAACACUUUCUUCUUCCUCTT
siLDHA(Forward)	CCUUAGAACACCAAAGAUUTT
siLDHA(Reverse)	AAUCUUUGGUGUUCUAAGGTT
Protein antibodies used for Western blotting
Antibody	band	Number
CD31	Proteintech	28083-1-AP
E-cad	Proteintech	20874-1-AP
EZH2	Abcam	ab191080
Flag	Proteintech	20543-1-AP
FTO	Proteintech	27226-1-AP
GLUT1	Proteintech	21829-1-AP
H3	abways	CY5879
H3K4la	PTMBIO	PTM-1420RM
H3K9la	PTMBIO	PTM-1419RM
H3K18la	PTMBIO	PTM-1427RM
H3K23la	PTMBIO	PTM-1413RM
H3K27la	PTMBIO	PTM-116RM
HK-2	Proteintech	22029-1-AP
Lambin1	Proteintech	66095-1-Ig
LDHA	Proteintech	19987-1-AP
m6A	Proteintech	68055-1-Ig
N-cad	Proteintech	22018-1-AP
PanKla	PTMBIO	PTM-1401RM
TIMP2	Proteintech	17353-1-AP
Vimentin	Proteintech	10366-1-AP
YTHDF2	Proteintech	24744-1-AP
β-actin	Affinity	AF7018
