# Supplementary material for: Multi-omics reveals crosstalk between lactylation and m6A methylation promotes angiogenesis in lung adenocarcinoma
Source: Research Square preprint supplement (doi:10.21203/rs.3.rs-7466899/v1), 2025-09-09
Supplement: Supplementary file 2 [file c4ee316a598db1cb0787b522.docx]

**1. Supplementary Methods**

**1.1. Seahorse metabolic analysis**

Metabolic flux analysis was performed with Agilent Seahorse XF kits to quantify glycolytic (XF Glycolysis Stress) and mitochondrial (XF Mito Stress) parameters. LUAD cells were plated in 96-well assay plates at optimal confluence. For glycolytic profiling, baseline measurements preceded sequential administration of glucose, oligomycin, and 2-DG. Mitochondrial respiration assessment involved staged exposure to oligomycin, FCCP, and rotenone/antimycin A. Real-time metabolic measurements were acquired using the XFe96 instrument platform, with subsequent data processing conducted through the manufacturer's proprietary analytical suite.

**1.2. CUT&Tag assay**

CUT&Tag assays were conducted by Guangzhou Epibiotek Co., Ltd. Bead-bound cellular samples were suspended in digestion-wash buffer supplemented with H3K27la-specific antibodies for 2 hours. Tagmentation was terminated by addition of Proteinase K (20 mg/mL), SDS (10%), and EDTA (0.5 M). PCR-amplified DNA was purified, and final libraries were sequenced on the Illumina Nova-seq system.

**1.3. Human mRNA&lncRNA epitranscriptomic microarray**

Total RNA from shNC and shFTO cells was assessed for concentration and purity via a NanoDrop spectrophotometer. Subsequent steps followed the manufacturer’s guidelines: RNA samples underwent m6A-specific immunoprecipitation, yielding modified RNA (IP) and unmodified RNA (Sup) fractions. Fluorescent labeling of IP (Cy5) and Sup (Cy3) RNAs was performed using the recommended dye system. Pooled cRNA probes were hybridized to a custom-designed human mRNA/lncRNA microarray (8×60K format). Post-hybridization washes were followed by dual-channel scanning with an Agilent G2505C platform.

**1.4. RNA immunoprecipitation (RIP) assays**

RIP assays were performed using the RNA-binding protein immunoprecipitation kit (Gisai, Guangzhou, China). RNA-protein complexes were isolated through optimized RIP buffer homogenization. Target ribonucleoprotein assemblies were affinity-enriched with 5 μg species-specific immunoglobulin (Proteintech, USA) alongside isotype-matched IgG controls. Eluted RNA constituents underwent sequential purification in nuclease-free aqueous medium, with final quantification performed using spectrophotometric analysis.

**1.5. Non-targeted metabolomics assay**

Non-targeted metabolomic analyses were conducted at APExBIO Technology, LLc (Shanghai, China) using standardized protocols. Metabolomic profiling was conducted on an Agilent 1290 Infinity II UHPLC system coupled to a 6545 UHD Q-TOF mass spectrometer. Nebulization pressure was maintained at 20 psi. Differential metabolites were identified using thresholds of VIP >1, absolute log2(fold change) >0.5, and statistical significance (P<0.05).

**1.6. Luciferase reporter assay**

The EZH2 fragment containing the wild-type m6A motif (EZH2-WT) and a C-substituted variant (EZH2-MT) were inserted into the PGL3-CMV-LUC-MCS vector (Genomeditech, Shanghai, China). EZH2 wild-type and mutant luciferase constructs were introduced alongside control vectors and FTO plasmids via the pGMR-TK Renilla reporter system (Genomeditech, Shanghai, China). Relative luciferase activity was assayed using SpectraMax L (Molecular devices, Sunnyvale, USA).

**1.7. Determination of lactate dehydrogenase and lactate levels**

LDH enzymatic activity was quantified with a cytotoxicity detection kit (Biyuntian, Shanghai). The lactate concentration was measured by the L-lactate (L-LA) content assay kit (Boxbio, Beijing, China). L-lactate dehydrogenase mediated the generation of pyruvate and H+ from L-lactic acid, and the product is formed by the hydrogen transfer of PMS, which has a characteristic absorption peak at 570 nm. Serum lactate concentrations were quantified using the same L-LA content assay kit.

**1.8. Western blot**

LUAD tissue samples and cells were lysed using RIPA buffer (Biyuntian Biotechnology Co., Ltd., Shanghai, China). Following SDS-PAGE separation, protein samples were electroblotted onto PVDF membranes (IPVH00010, Merck Millipore, Darmstadt, Germany) for subsequent analysis. The PVDF membranes were incubated overnight at 4°C using the diluted antibody. Protein bands were visualized by enhanced chemiluminescence methods. Anti-histone H3 and β-actin antibodies served as normalization standards for experimental controls. Primary antibodies for Western blotting were listed in Supplementary Materials Table S2.

**1.9. RNA extraction and real‐time quantitative PCR (RT‐qPCR)**

Total RNA isolation was performed with the Total RNA Kit I (Omega Bio-Tek, Norcross, GA, USA), followed by cDNA generation using the 5X FastKing-RT Supermix reverse transcription system (Tiangen, Beijing, China). Amplification reactions were carried out with SYBR Green Master Mix (Vazyme; Q111-02) and the products were quantified on a StepOne PCR system. The primer sequences were described in Supplementary Materials Table S2.

**1.10. IHC staining**

After baking the Formalin-Fixed Paraffin-Embedded (FFPE) sections were baked at 65°C for 1 h followed by deparaffinization through xylene (3 × 5 min) and graded ethanol washes. Antigen retrieval was performed by microwave heating in 10 mM sodium citrate buffer (pH 6.0) at 95°C for 15 min. After 1 h of blocking, instilled primary antibody dilution on tumor tissue and incubated at 4°C for 16 h. The secondary antibody was incubated at room temperature for 1 h, followed by chromogenic development with DAB substrate (DAKO) and counterstaining with hematoxylin.

**1.11. Subcellular isolation**

LUAD cells were subjected to subcellular fractionation using the Nuclear Protein and Cytoplasmic Protein Extraction Kit (P0027, Biyuntian, China), and the expression of genes was detected by WB, and β-actin and lamin B1 serving as loading controls for cytoplasmic and nuclear protein fractions, respectively.

**1.12. Immunofluorescence**

The cells were fixed and blocked, and the corresponding antibodies were added for incubation. Specimens were mounted using an antifade mounting medium including 4',6-diamidino-2-phenylindole (DAPI), observed and documented using fluorescence microscopy. Tissue sections were processed through deparaffinization and rehydration prior to immunofluorescence staining, with subsequent steps mirroring the cellular immunofluorescence protocol.

**1.13. Co-culture of endothelial cells and tumor cells**

HUVEC and LUAD cells were plated in the lower and upper compartments of 0.4 mm membrane inserts, respectively. The co-culture system was maintained under standard conditions (37°C, 5% CO₂), with physical separation achieved by removal of the upper compartment after incubation.

**1.14.** **4D label-free lactylome analysis**

The tryptic peptides were reconstituted in mobile phase A and subjected to direct loading on a column (15 cm × 100 μm). Binary solvent gradients containing 0.1% aqueous formic acid (phase A) and 80% acetonitrile/0.1% formic acid (phase B) were delivered at 400 nL/min via Vanquish Neo UPLC (Thermo Scientific). Precursor ions were monitored in the Orbitrap mass analyzer, while fragment ions were detected using the Astral detector. MS/MS acquisition parameters included: initial m/z 150.0 with 80,000 resolving power, 25% normalized collision energy for HCD fragmentation, 500% AGC target, and 3 ms maximum injection duration.
