# Supplementary material for: Multi-omics reveals crosstalk between lactylation and m6A methylation promotes angiogenesis in lung adenocarcinoma
Source: Research Square preprint supplement (doi:10.21203/rs.3.rs-7466899/v1), 2025-09-09
Supplement: Supplementary file 3 [file d072d0dcb4adbe2c71ed7383.xlsx]

## Sheet: Sheet1
				Clinicopathological features
Smoking	Age	Tumor Location	Pathological types	T	N	M	CEA	Death or not	Survival days	SUVmax
Y	62Y	L	Lung adenocarcinoma	T1a	N0	M0	N	1	1958	2.1
Y	66Y	R	Lung adenocarcinoma	T2a	N0	M0	P	0	2493	12.2
Y	55Y	L	Lung adenocarcinoma	T2a	N1	M0	P	0	148	8.7
N	65Y	L	Lung adenocarcinoma	T1c	N1	M0	P	1	2561	10.4
Y	62Y	L	Lung adenocarcinoma	T1b	N2	M0	N	1	2555	24.1
N	52Y	L	Lung adenocarcinoma	T1c	N1	M0	N	1	2555	5.3
N	61Y	L	Lung adenocarcinoma	T1b	N0	M0	N	1	2555	0
N	47Y	L	Lung adenocarcinoma	T1a	N0	M0	N	1	2555	0
N	62Y	R	Lung adenocarcinoma	T1b	N0	M0	N	1	2563	10.7
Y	40Y	R	Lung adenocarcinoma	T1b	N0	M0	P	1	2550	5.3
N	68Y	L	Lung adenocarcinoma	T1b	N0	M0	N	0	2138	1.6
N	49Y	L	Lung adenocarcinoma	T2b	N2	M0	P	1	2543	20.9
N	37Y	L	Lung adenocarcinoma	T2a	N1	M0	N	1	2543	13.4
Y	49Y	R	Lung adenocarcinoma	T1b	N0	M0	N	1	2540	14.4
N	59Y	L	Lung adenocarcinoma	T1b	N0	M0	P	1	2528	2.1
Y	50Y	L	Lung adenocarcinoma	T1a	N0	M0	N	0	770	1.2
N	54Y	R	Lung adenocarcinoma	T1c	N0	M0	P	1	2394	2.3
N	60Y	L	Lung adenocarcinoma	T1a	N0	M0	P	1	2382	0
N	64Y	R	Lung adenocarcinoma	T1c	N0	M0	P	1	2381	4.9
N	76Y	R	Lung adenocarcinoma	T1b	N0	M0	N	1	2380	2.6
Y	46Y	R	Lung adenocarcinoma	T2a	N1	M0	N	0	2002	13.3
N	58Y	R	Lung adenocarcinoma	T2a	N0	M0	N	0	2357	1.4
N	39Y	L	Lung adenocarcinoma	T3	N1	M0	N	1	2345	9.3
Y	69Y	R	Lung adenocarcinoma	T1b	N0	M0	N	0	1865	2
N	52Y	R	Lung adenocarcinoma	T1c	N0	M0	N	1	2344	4.5
Y	61Y	L	Lung adenocarcinoma	T1c	N0	M0	N	1	2331	2.7
N	55Y	L	Lung adenocarcinoma	T1a	N0	M0	N	1	2322	0
N	65Y	R	Lung adenocarcinoma	T1b	N0	M0	N	1	2308	3.4
Y	72Y	L	Lung adenocarcinoma	T2a	N0	M0	P	1	2307	10.68
N	63Y	R	Lung adenocarcinoma	T1a	N0	M0	N	0	1836	0
Y	60Y	R	Lung adenocarcinoma	T1b	N0	M0	N	0	1424	4.2
N	68Y	L	Lung adenocarcinoma	T1c	N0	M0	N	1	2290	1.8
N	59Y	R	Lung adenocarcinoma	T1b	N0	M0	N	1	2287	1.5
Y	50Y	L	Lung adenocarcinoma	T2a	N2	M0	P	0	1835	11.9
N	63Y	L	Lung adenocarcinoma	T1c	N0	M0	N	1	2276	3.4
N	69Y	R	Lung adenocarcinoma	T2a	N2	M0	N	0	2026	6.1
N	62Y	L	Lung adenocarcinoma	T2b	N0	M0	N	0	1932	11.8
Y	60Y	R	Lung adenocarcinoma	T2b	N0	M0	N	0	934	4.8
N	34Y	R	Lung adenocarcinoma	T3	Nx	M0	N	1	2266	5.1
N	33Y	L	Lung adenocarcinoma	T1c	N2	M0	N	1	2266	5.3
N	55Y	R	Lung adenocarcinoma	T2a	N2	M0	N	1	2252	8.3
Y	64Y	L	Lung adenocarcinoma	T1b	N0	M0	N	1	2252	11.8
Y	49Y	R	Lung adenocarcinoma	T4	N0	M0	N	0	1625	0
Y	38Y	L	Lung adenocarcinoma	T3	N0	M0	N	1	2249	13.2
N	69Y	L	Lung adenocarcinoma	T1b	N0	M0	N	1	2249	3.2
N	62Y	L	Lung adenocarcinoma	T1b	N0	M0	N	0	1377	1.3
N	36Y	R	Lung adenocarcinoma	T1a	N0	M0	N	0	994	0
N	37Y	R	Lung adenocarcinoma	T1b	N0	M0	P	1	2247	7.7
Y	65Y	R	Lung adenocarcinoma	T1a	N0	M0	N	0	707	2.8
N	53Y	R	Lung adenocarcinoma	T1a	N0	M0	N	1	2242	9
Y	66Y	L	Lung adenocarcinoma	T1a	N0	M0	N	1	2214	3.6
Y	61Y	R	Lung adenocarcinoma	T1b	N0	M0	N	0	1241	25.6
Y	48Y	L	Lung adenocarcinoma	T1a	N0	M0	N	0	798	2.4
Y	60Y	R	Lung adenocarcinoma	T1a	N0	M0	N	1	2183	3.5
N	54Y	R	Lung adenocarcinoma	T1b	N0	M0	N	0	632	10.3
N	58Y	R	Lung adenocarcinoma	T1a	N0	M0	N	0	1509	2.6
N	65Y	R	Lung adenocarcinoma	T1b	N0	M0	N	0	1079	4.86
N	70Y	L	Lung adenocarcinoma	T1a	N0	M0	N	0	953	2.1
Y	64Y	L	Lung adenocarcinoma	T1b	N0	M0	N	0	1113	8.7
Y	54Y	R	Lung adenocarcinoma	T1a	N0	M0	N	1	1972	0
N	58Y	R	Lung adenocarcinoma	T1a	N0	M0	N	1	1972	1.1
N	56Y	R	Lung adenocarcinoma	T1a	N0	M0	N	1	1954	0.91
Y	68Y	R	Lung adenocarcinoma	T1a	N0	M0	N	1	1951	2.8
N	69Y	L	Lung adenocarcinoma	T1b	N0	M0	N	0	1343	10.6
N	63Y	R	Lung adenocarcinoma	T4	N0	M0	P	0	16	1.1
Y	64Y	R	Lung adenocarcinoma	T1	N0	M0	N	1	1927	1.6
N	48Y	R	Lung adenocarcinoma	T2b	N2	M0	N	1	1931	13.7
N	69Y	L	Lung adenocarcinoma	T2	N0	M0	P	0	569	10.7
N	55Y	R	Lung adenocarcinoma	T1	N0	M0	N	1	1923	4.6
N	61Y	R	Lung adenocarcinoma	T1a	N0	M0	N	0	345	3.5
N	50Y	R	Lung adenocarcinoma	T1a	N0	M0	N	1	1923	2
N	67Y	L	Lung adenocarcinoma	T2	N0	M0	N	1	1871	2.8
Y	48Y	R	Lung adenocarcinoma	T2a	N2	M0	N	1	1917	8.8
	74Y	L	Lung adenocarcinoma	T1a	N0	M0	N	0	940	1.05
N	52Y	L	Lung adenocarcinoma	T2a	N0	M0	N	0	633	4.2
N	62Y	R	Lung adenocarcinoma	T2b	N2	M0	N	1	1899	15.6
Y	61Y	L	Lung adenocarcinoma	T1	N0	M0	P	0	1292	7.5
N	46Y	L	Lung adenocarcinoma	T1a	N0	M0	N	1	1860	4.5
Y	55Y	L	Lung adenocarcinoma	T2	N0	M0	P	0	1379	14.5
N	68Y	L	Lung adenocarcinoma	T1	N0	M0	N	1	1892	4.5
N	36Y	L	Lung adenocarcinoma	T2	N2	M0	P	0	939	1.3
N	59Y	R	Lung adenocarcinoma	T1a	N0	M0	N	1	1806	4.5
N	66Y	R	Lung adenocarcinoma	T1a	N0	M0	N	0	1050	1.4
N	67Y	R	Lung adenocarcinoma	T1b	N0	M0	N	1	1800	2.19
